# Supplementary material for: An experimental study of the reactivity of terpinolene and β-caryophyllene with the nitrate radical
Source: Copernicus journal article supplement (doi:10.5194/acp-2021-1011), 2021-12-13
Supplement: Supplementary file 1 [file acp-2021-1011-supplement.pdf]

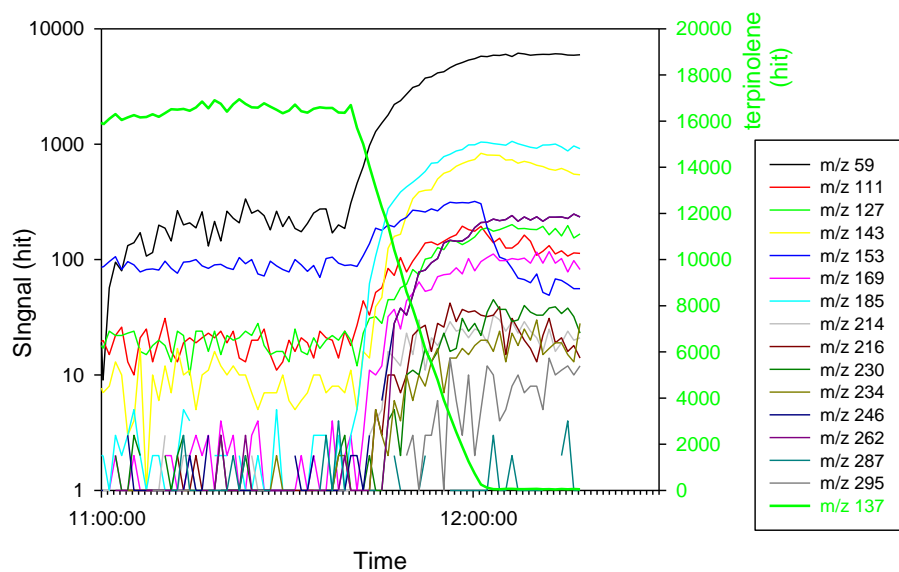

**Figure S1 : Example of typical time profiles of terpinolene and products detected with PTR-MS for the experiment of the 2017/12/18.**

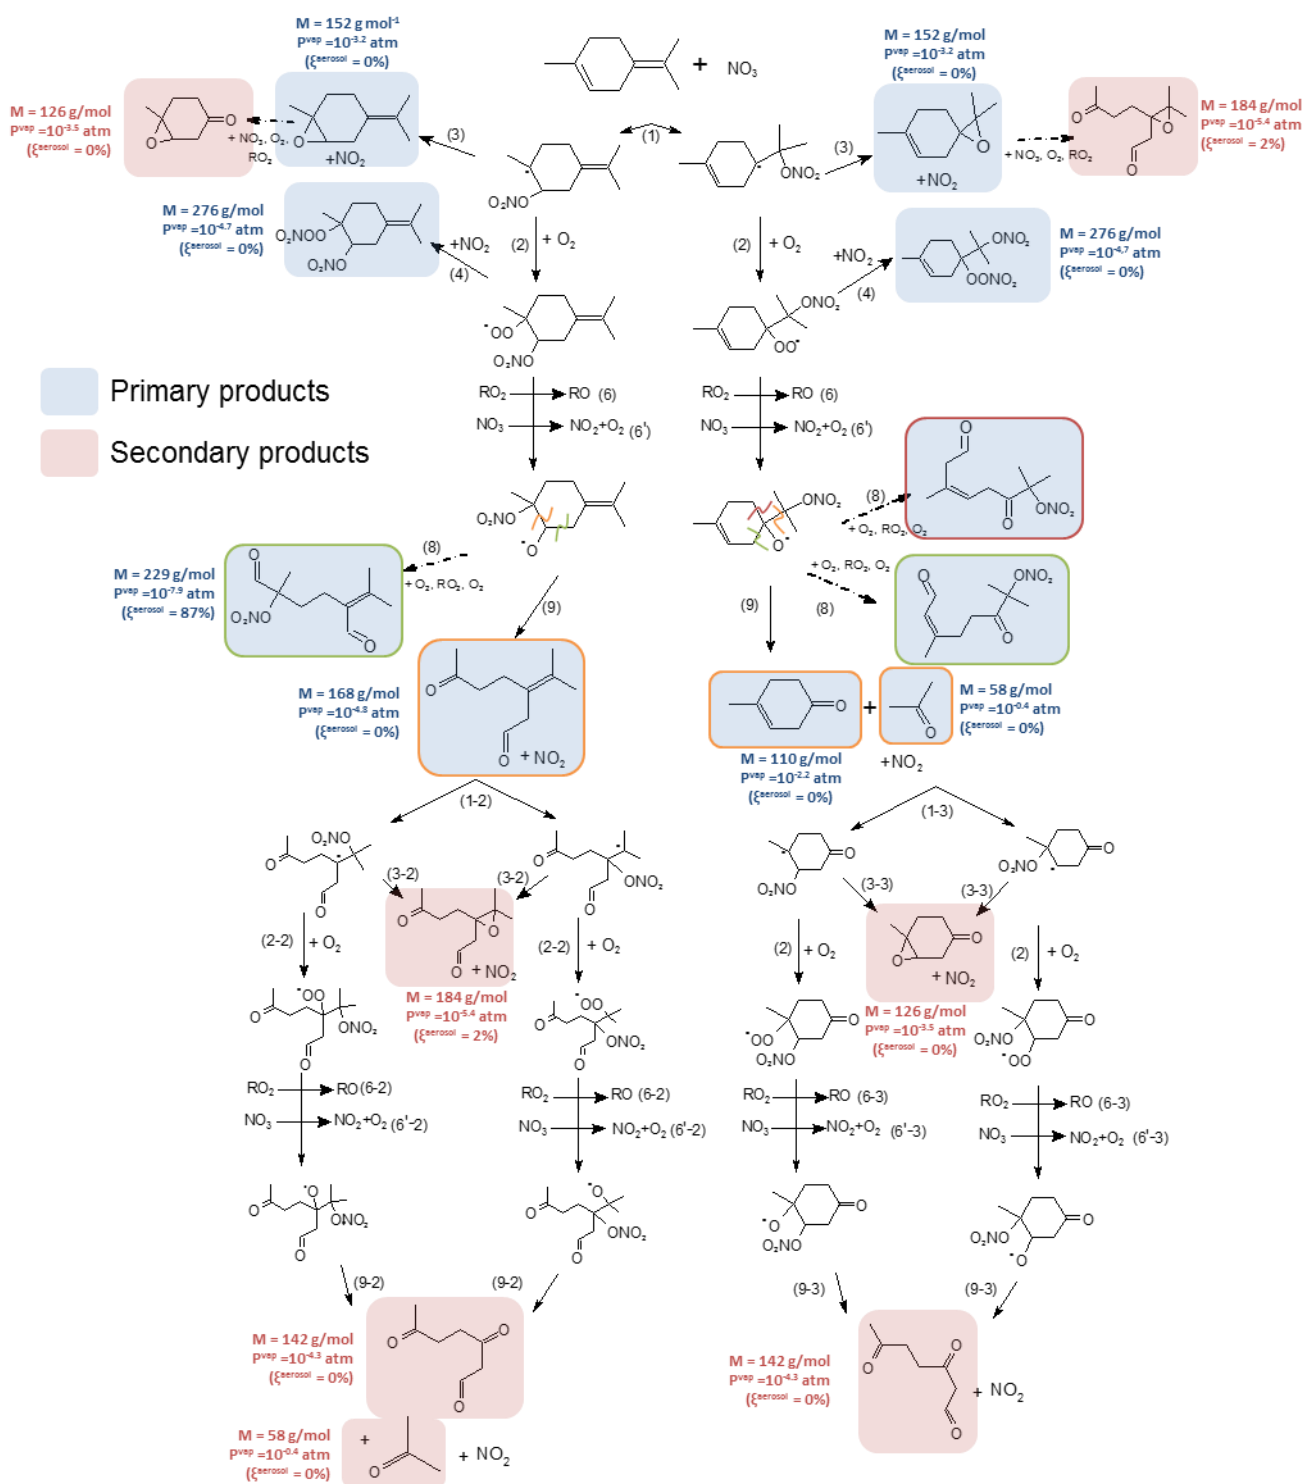

**Figure S2: Proposed mechanism for terpinolene. First generation products are squared in blue and second generation ones in red. Alkoxy fragmentation products are squared according to the location of the fragmentation. Molecular weight, vapor pressures and the gas/particle partition are shown next to the molecules.**

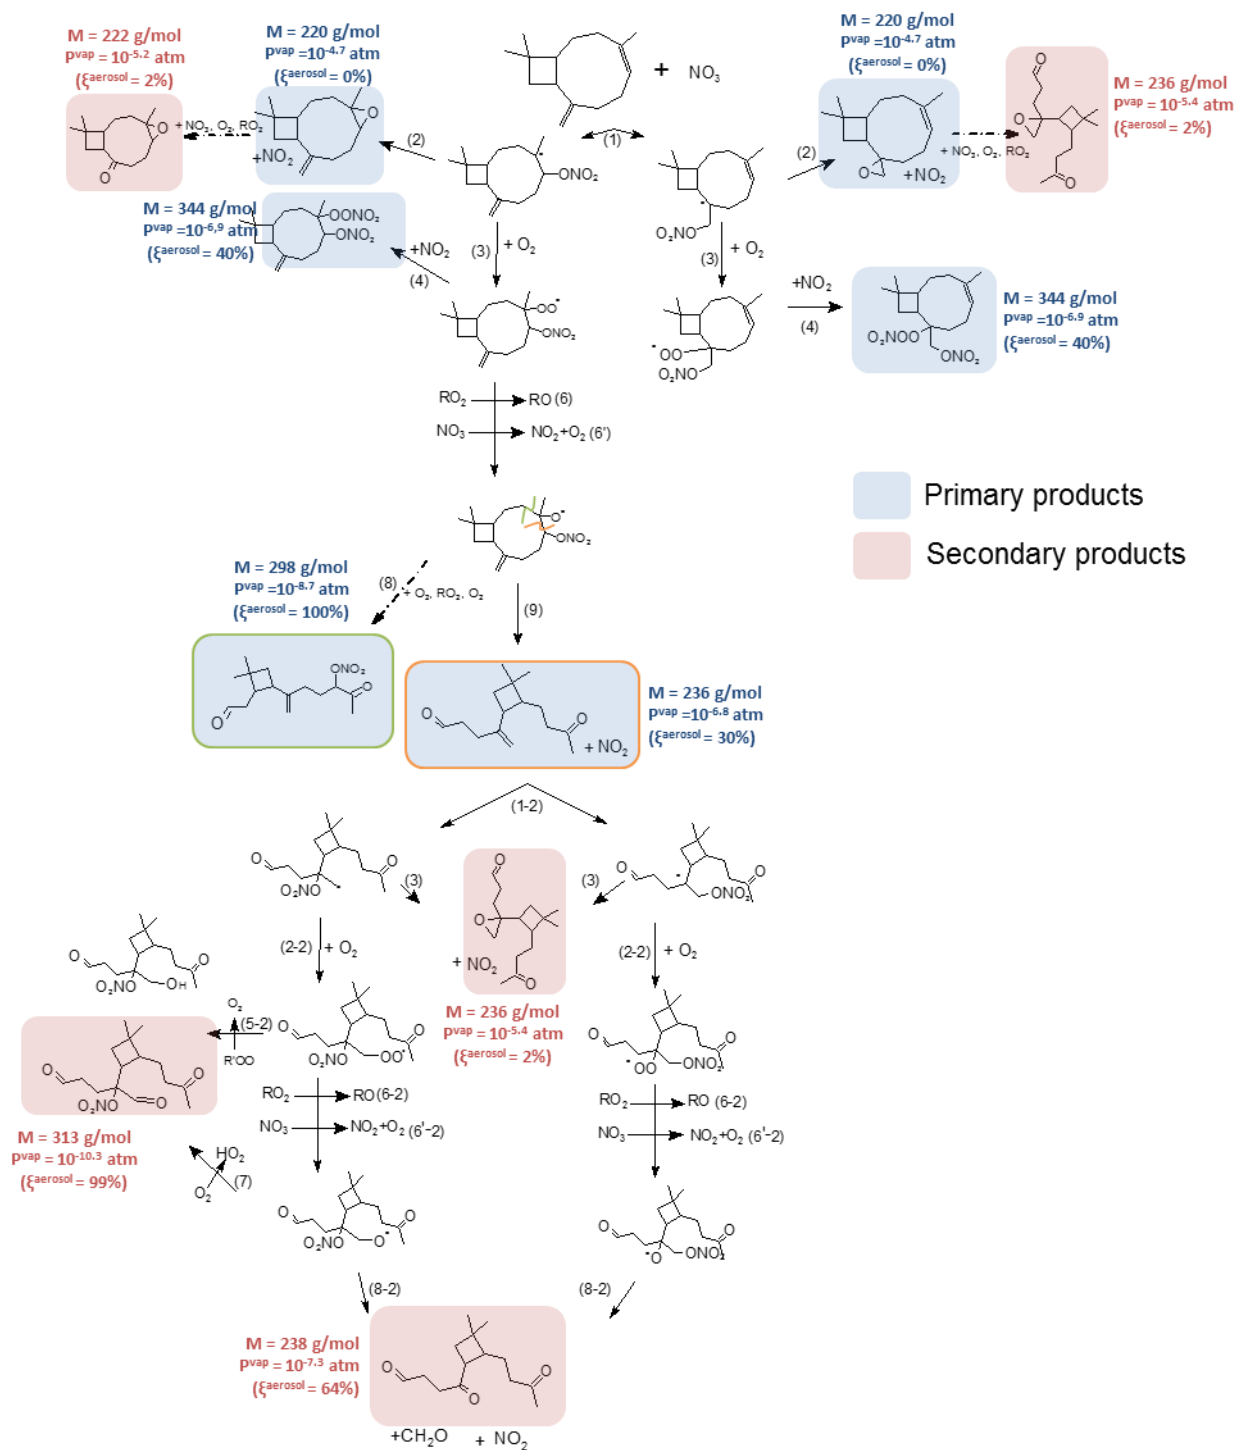

**Figure S5: Proposed mechanism for  $\beta$ -caryophyllene. First generation products are squared in blue and second generation ones in red. Alkoxy fragmentation products are squared according to the location of the fragmentation. Molecular weight, vapor pressures and the gas/particle partition are shown next to the molecules.**
